# Supplementary material for: CaMKII controls neuromodulation via neuropeptide gene expression and axonal targeting of neuropeptide vesicles
Source: PubMed Central journal article supplement (PMC7447270; doi:10.1371/journal.pbio.3000826), 2020-08-10
Supplement: pbio.3000826.s012.pdf [file pbio.3000826.s012.pdf]

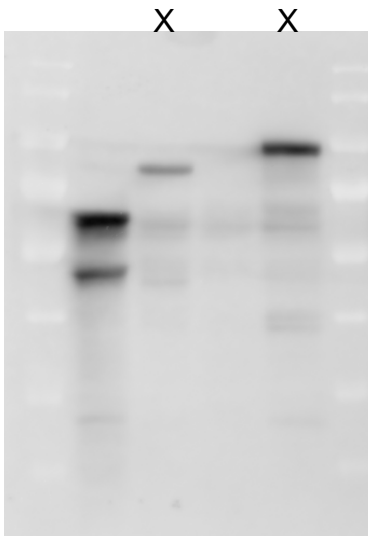

Raw image for Fig 1B top panel - CaMKII  
Lane 1: Ladder  
Lane 2: WT  
Lane 3: CaMKII DKO +  $\alpha$ CaMKII-CFP  
Lane 4: CaMKII DKO  
Lane 5: CaMKII DKO +  $\beta$ CaMKII-CFP  
Lane 6: Ladder  
Alkaline phosphatase precipitation was used to visualize the protein of interest

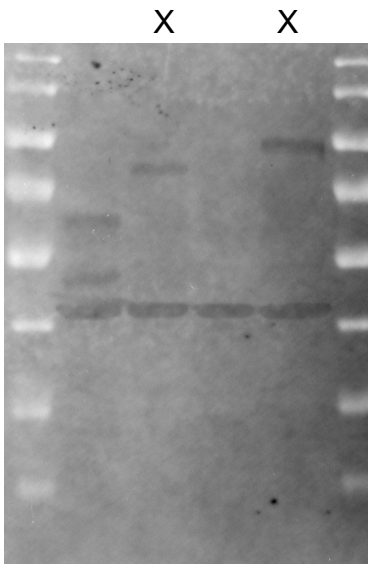

Raw image for Fig 1B low panel - Actin  
Lane 1: Ladder  
Lane 2: WT  
Lane 3: CaMKII DKO +  $\alpha$ CaMKII-CFP  
Lane 4: CaMKII DKO  
Lane 5: CaMKII DKO +  $\beta$ CaMKII-CFP  
Lane 6: Ladder  
Alexa 488 was used to visualize the protein of interest

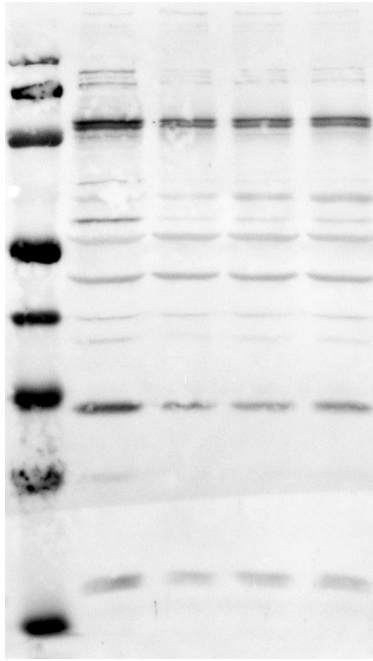

Raw image for Fig 5C top panel - Chromogranin B  
Lane 1: Ladder  
Lane 2: WT  
Lane 3: CaMKII DKO  
Lane 4: CaMKII DKO +  $\alpha$ CaMKII-CFP  
Lane 5: CaMKII DKO +  $\beta$ CaMKII-CFP  
Alkaline phosphatase precipitation was used to visualize the protein of interest

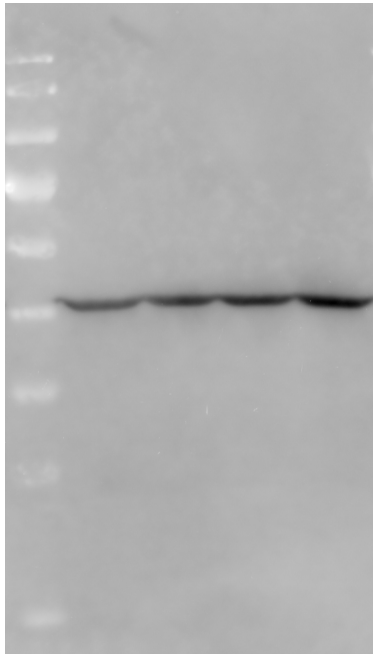

Raw image for Fig 5C top panel - Actin  
Lane 1: Ladder  
Lane 2: WT  
Lane 3: CaMKII DKO  
Lane 4: CaMKII DKO +  $\alpha$ CaMKII-CFP  
Lane 5: CaMKII DKO +  $\beta$ CaMKII-CFP  
Alexa 617 was used to visualize the protein of interest

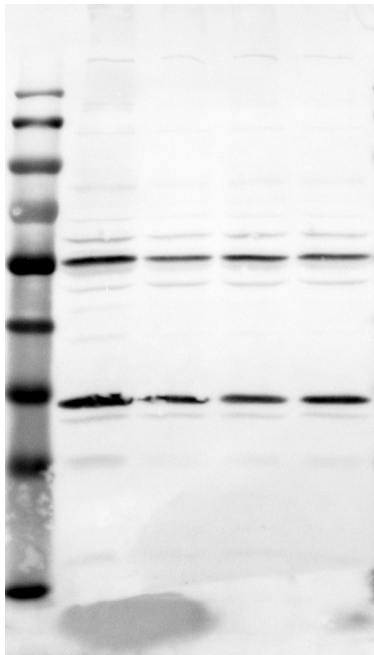

Raw image for Fig 5C low panel - Secretogranin II  
Lane 1: Ladder  
Lane 2: WT  
Lane 3: CaMKII DKO  
Lane 4: CaMKII DKO +  $\alpha$ CaMKII-CFP  
Lane 5: CaMKII DKO +  $\beta$ CaMKII-CFP  
Alkaline phosphatase precipitation was used to visualize the protein of interest

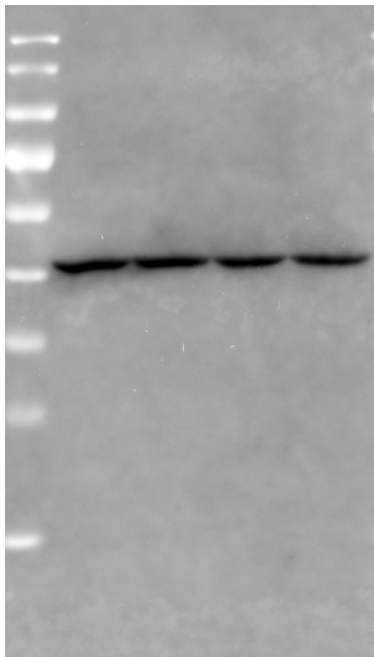

Raw image for Fig 5C low panel - Actin  
Lane 1: Ladder  
Lane 2: WT  
Lane 3: CaMKII DKO  
Lane 4: CaMKII DKO +  $\alpha$ CaMKII-CFP  
Lane 5: CaMKII DKO +  $\beta$ CaMKII-CFP  
Alexa 617 was used to visualize the protein of interest
